# Supplementary material for: SIRT6 is a DNA double-strand break sensor
Source: eLife journal article supplement (doi:10.7554/elife.51636), 2020-01-29
Supplement: supp [file elife_poa_e51636_Figure_2_figure_supplement_1.docx]

**Figure 2- figure supplement 1**

**B.**


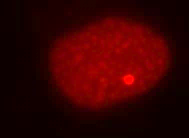

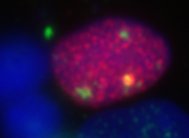

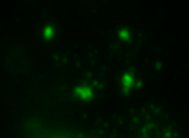

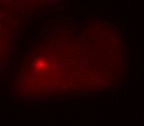

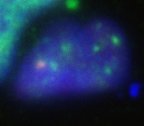

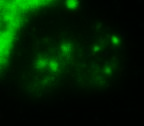


**NBS1- LacR**

**ɤH2AX ab**

**Merge + DAPI**

**MRE11- LacR**

**ɤH2AX ab**

**Merge + DAPI**


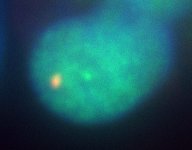

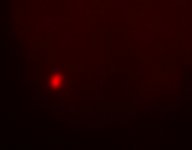

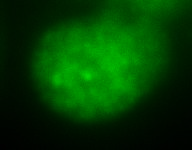


**ATM- LacR**

**ɤH2AX ab**

**Merge + DAPI**


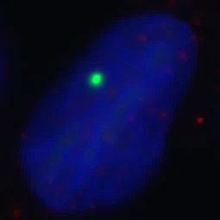

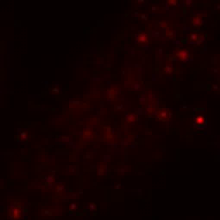

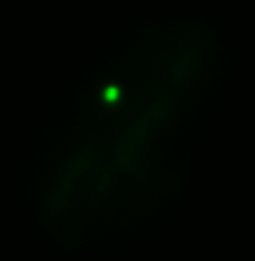


**Ku80- LacR**

**ɤH2AX ab**

**Merge + DAPI**


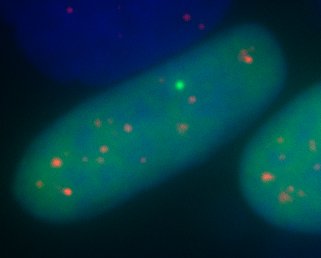

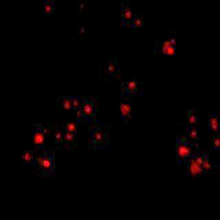

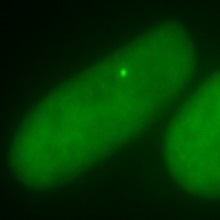


**GFP- LacR**

**ɤH2AX ab**

**Merge + DAPI**


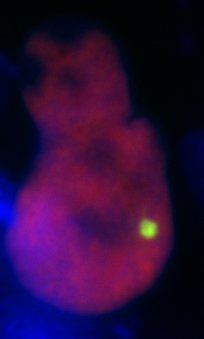

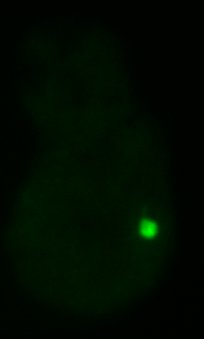

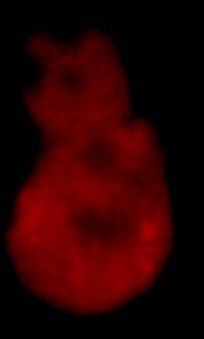


**Ku80- LacR**

**SIRT6**

**Merge + DAPI**


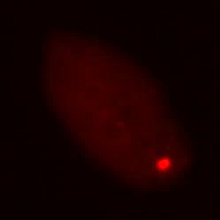

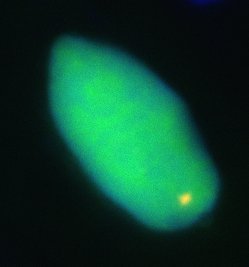

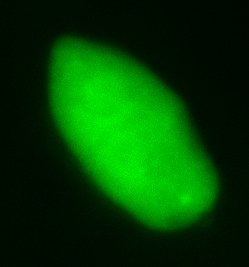


**NBS1- LacR**

**SIRT6**

**Merge + DAPI**


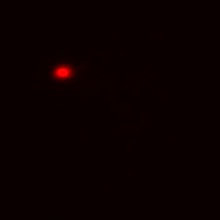

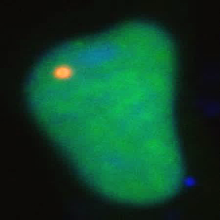

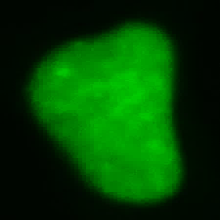


**MRE11- LacR**

**SIRT6**

**Merge + DAPI**


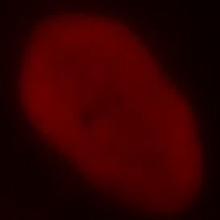

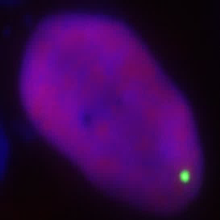

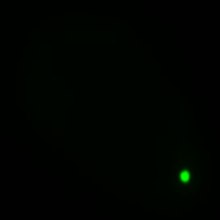


**GFP- LacR**

**SIRT6**

**Merge + DAPI**

**D.**

**A.**

**C.**

**Figure 2- figure supplement 1**

**(A-B)** Initiation of DNA damage response by ATM-LacR-Cherry (n=33, p<0.005), NBS1-LacR-Cherry (n=82, p<0.05), MRE11-LacR-Cherry (n=136, p<0.005) and Ku80-LacR-GFP (n=52, p>0.05) in the tethering system, IF and calculation of co-localization percentage with ɤH2AX (compared to GFP-LacR (n=310)). **(C-D)** Recruitment of SIRT6-GFP/SIRT6-Cherry to LacO sites by NBS1-LacR-Cherry (n=87, p<0.0005), MRE11-LacR-Cherry (n=31, p<0.005), Ku80-LacR-GFP (n=45,p<0.005) and GFP-LacR (n=85). Averages of 3-5 experiments +/- SEM.
