# Supplementary material for: SIRT6 is a DNA double-strand break sensor
Source: eLife journal article supplement (doi:10.7554/elife.51636), 2020-01-29
Supplement: supp [file elife_poa_e51636_Figure_4_figure_supplement_1.docx]

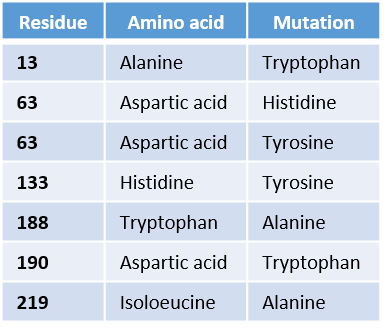


**A.**

**Figure 4- figure supplement 1**


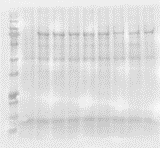


**I219A**

**D190W**

**W188A**

**H133Y**

**D63Y**

**D63H**

**A13W**

**WT**

**-**

**B.**

**C.**

**D.**

**Figure 4- figure supplement 1**

**(A)** List of generated SIRT6 point mutations in the SIRT6 tunnel structure. **(B)** Ponceau staining of SIRT6-MBP point mutants. **(C)** SIRT6-MBP mutants catalytic activity, assessed by H3K9 de-myristolation in a FLUOR DE LYS assay. **(D)** His-tagged mammalian Sirtuins DNA binding ability of circular and linear plasmids. Log of averages of 4-7 experiments +/- SEM (*=p<0.05, **=p<0.005, ***=p<0.0005).
