# Supplementary material for: SIRT6 is a DNA double-strand break sensor
Source: eLife journal article supplement (doi:10.7554/elife.51636), 2020-01-29
Supplement: supp [file elife_poa_e51636_Figure_5_figure_supplement_1.docx]

**Figure 5- figure supplement 1**

**Figure 5- figure supplement 1**

**(A)** Western blot of nuclear protein fraction of LacO containg U2OS cells after 12 or 24h treatment with 0, 5 or 10mM Nicotinamide (NAM) supplemented to their media. **(B)** Co-localization percentage with ɤH2AX of SIRT6 HY-LacR-GFP and GFP-LacR after 24h treatment with NAM at three concentrations (*=p<0.05, **=p<0.005, ***=p<0.0005). **(C)** IF of co-localization of Core-LacR-GFP (n=66, p>0.05). Experiment quantification appears in **Fig.** **5C**. **(D)** IF of co-localization of SIRT1-LacR-GFP (n=44, p>0.05), SIRT2-LacR-GFP (n=67, p<0.005) and SIRT7-LacR-GFP (n=68, p<0.005). Experiment quantification appears in **Fig.** **5D**.


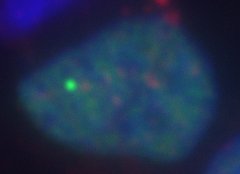

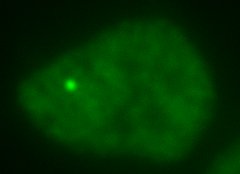

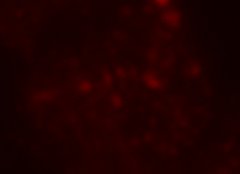


**SIRT1-LacR**

**ɤH2AX ab**

**Merge + DAPI**


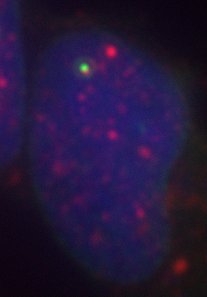

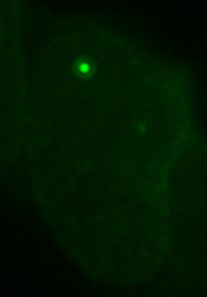

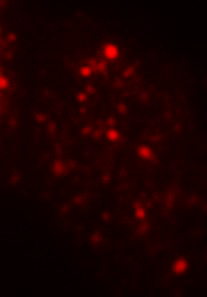


**SIRT2-LacR**

**ɤH2AX ab**

**Merge + DAPI**


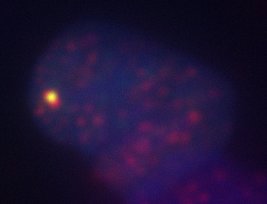

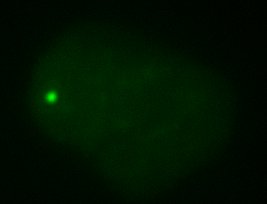

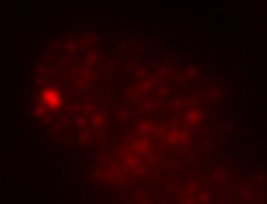


**SIRT7-LacR**

**ɤH2AX ab**

**Merge + DAPI**


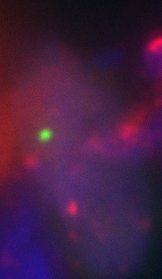

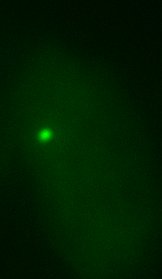

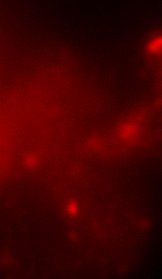


**Core-LacR**

**ɤH2AX ab**

**Merge + DAPI**

**D.**


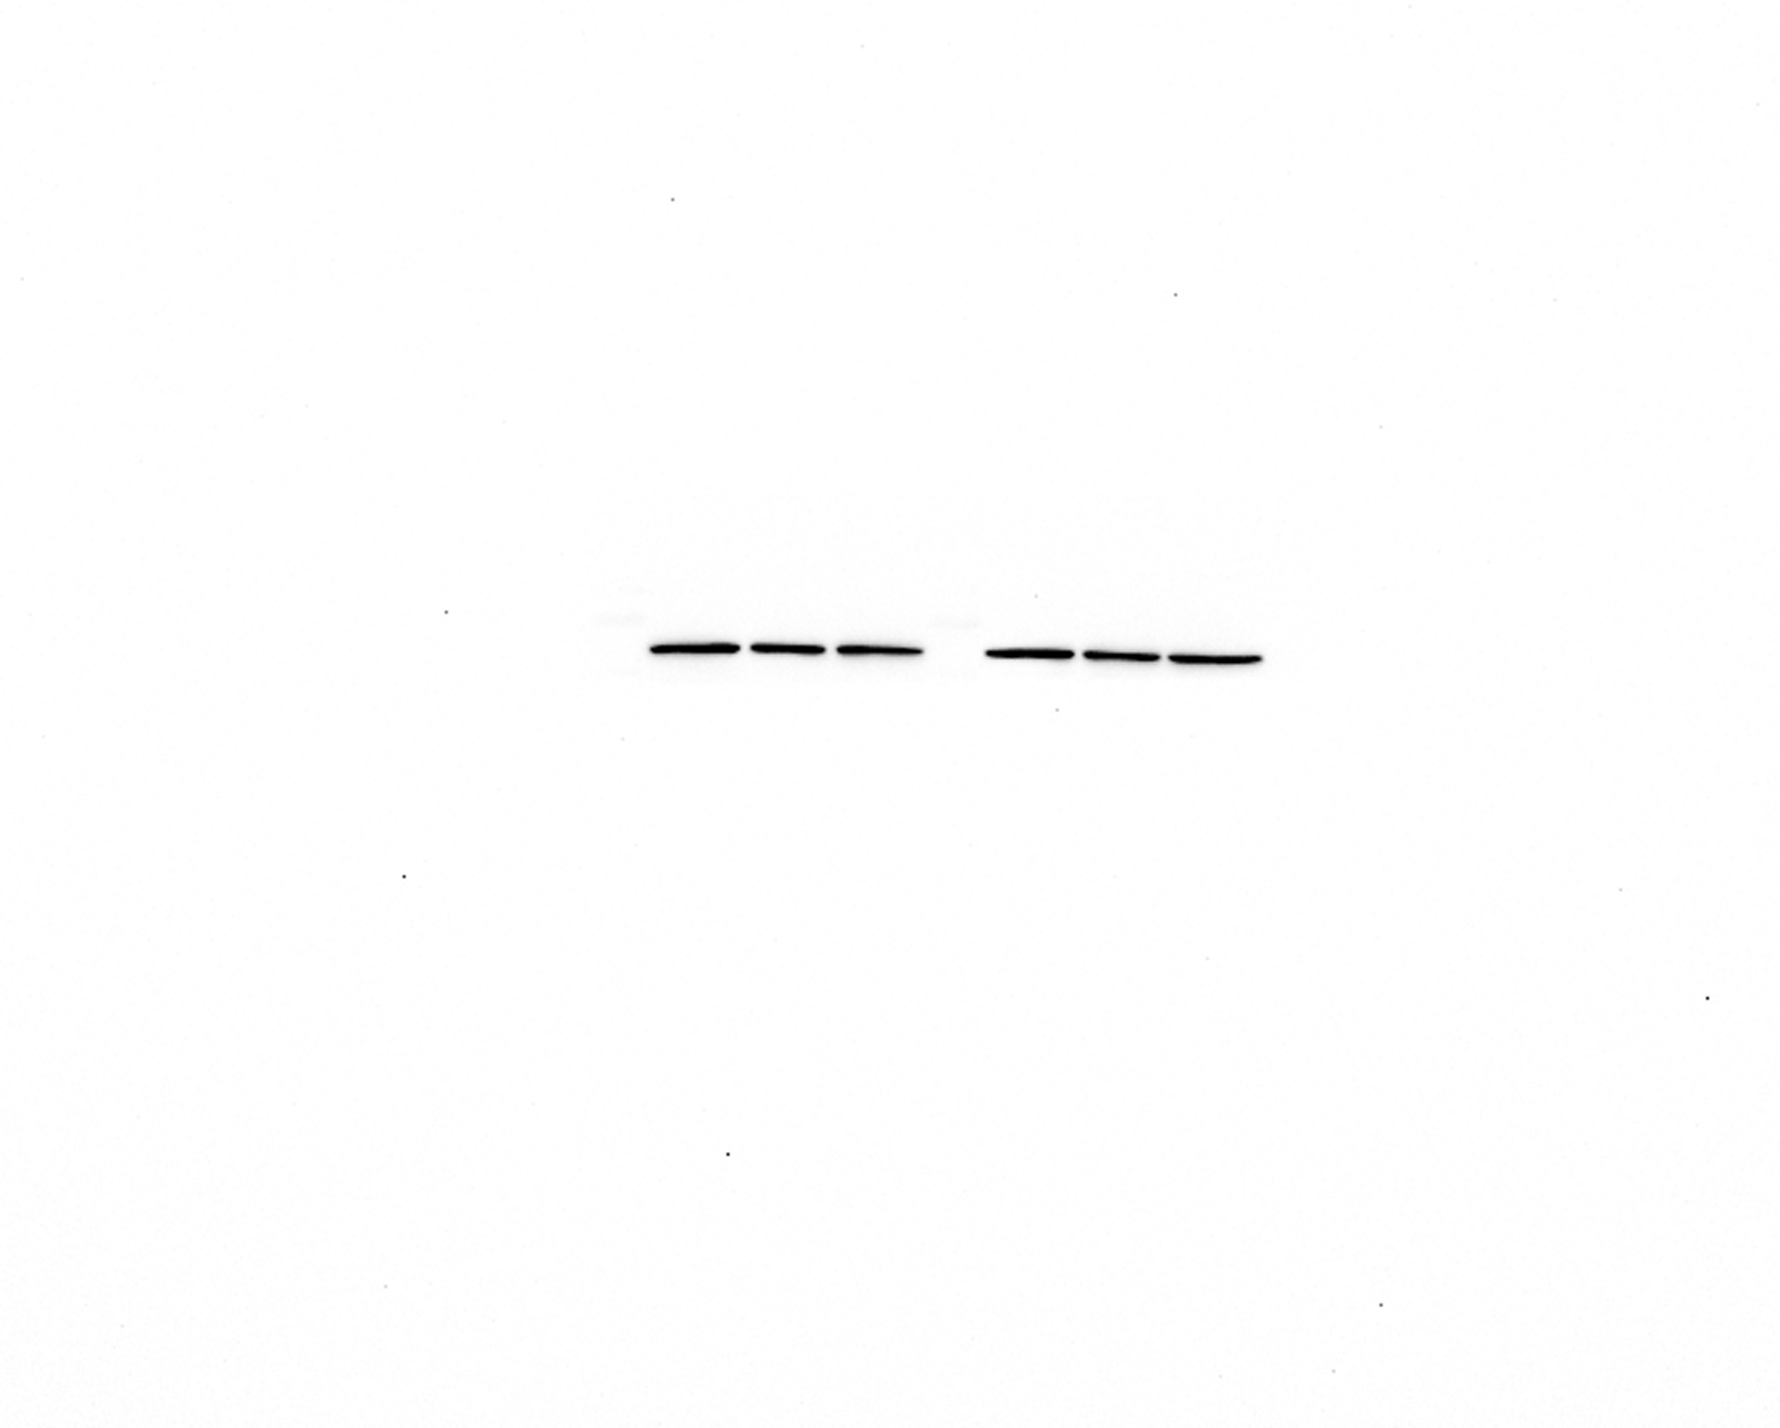

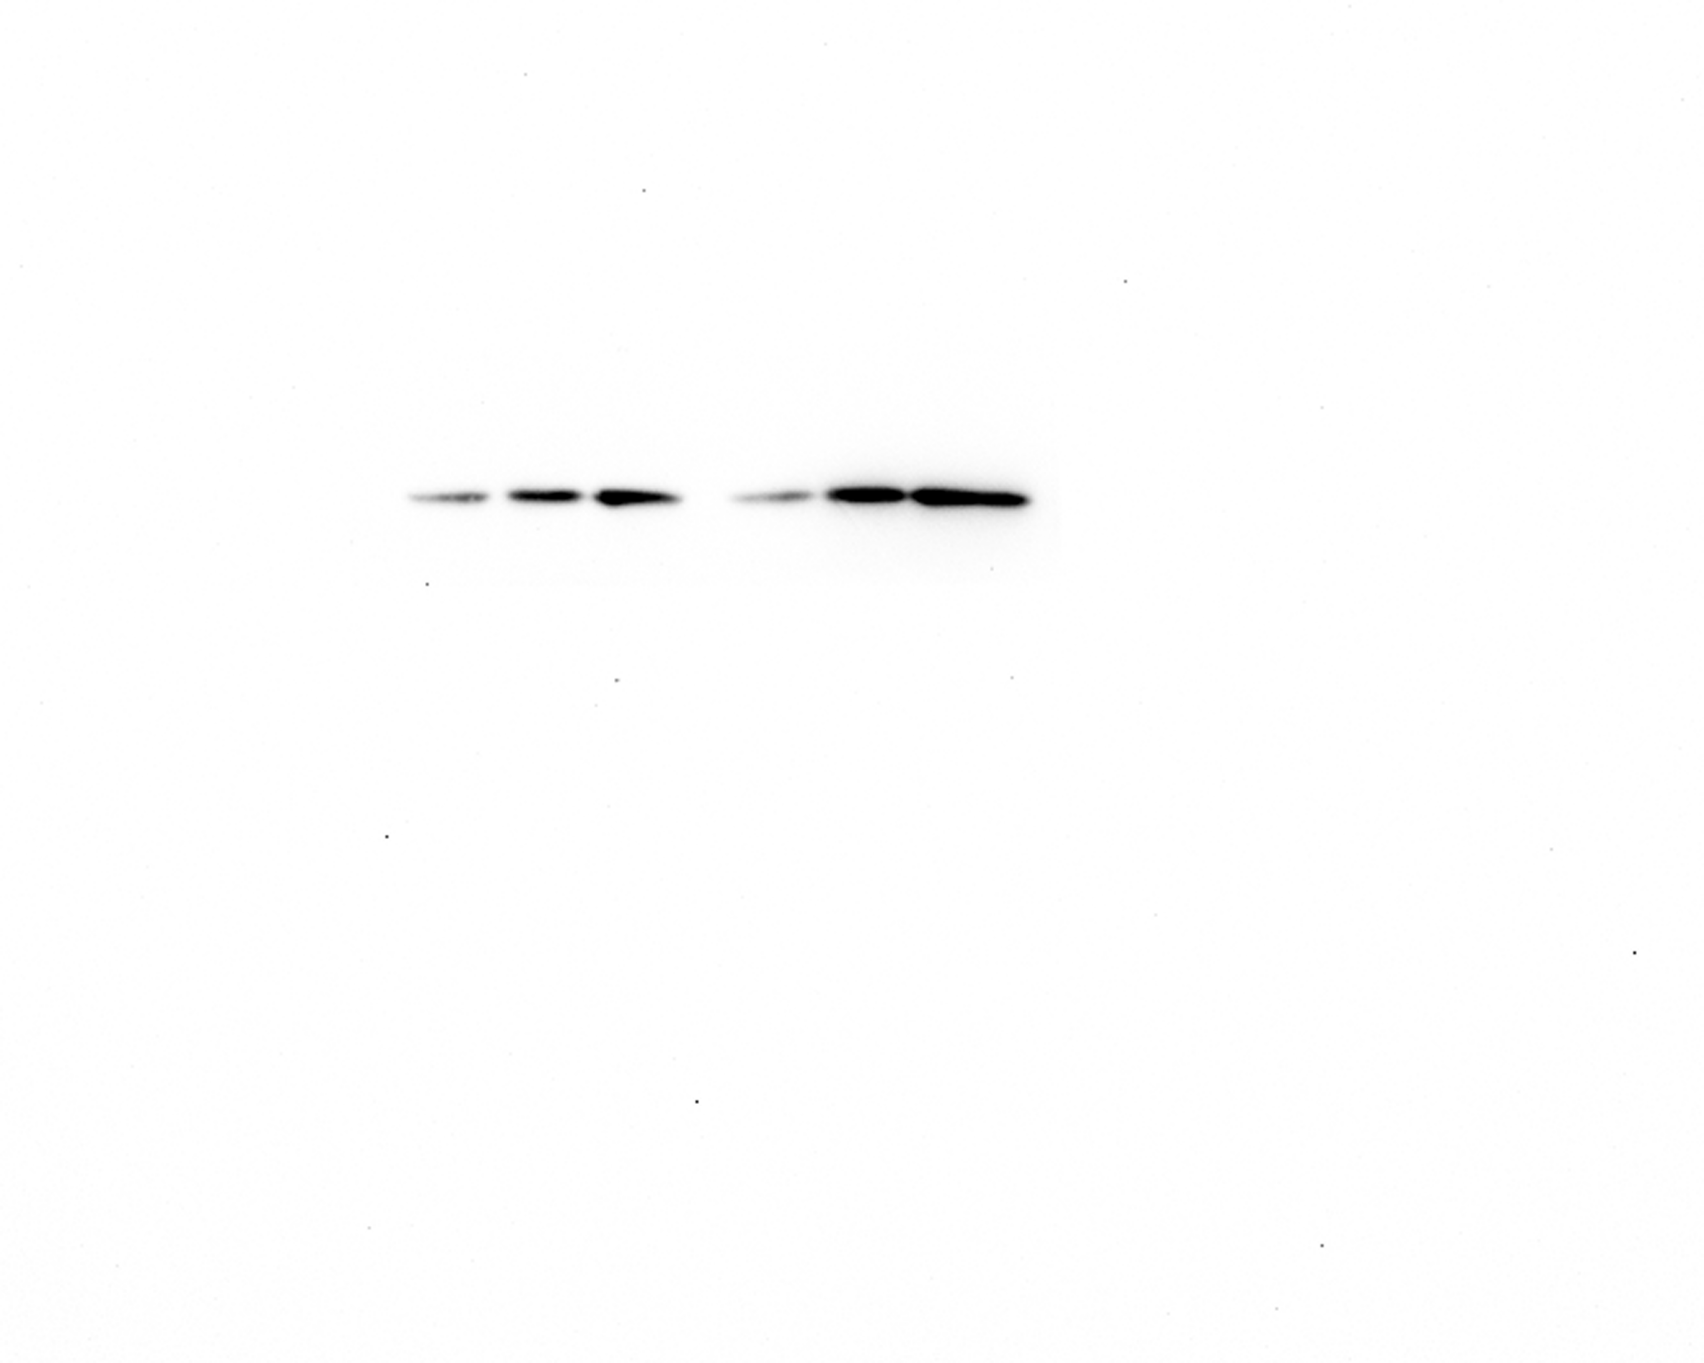


**12h Treatment**

**24h Treatment**

**HSC70**

**SIRT6**

**H3K56ac**


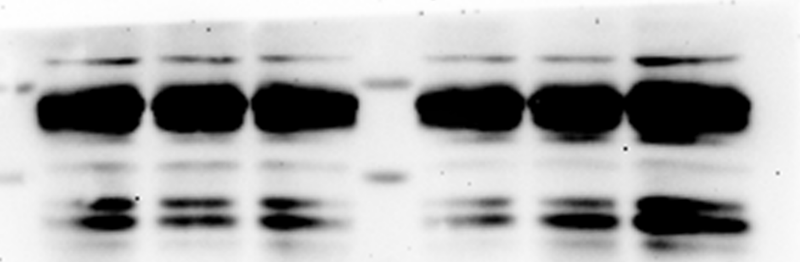


**NAM (mM)**

**0**

**5**

**10**

**0**

**5**

**10**

**A.**

**B.**

**C.**
