# Supplementary material for: SIRT6 is a DNA double-strand break sensor
Source: eLife journal article supplement (doi:10.7554/elife.51636), 2020-01-29
Supplement: supp [file elife_poa_e51636_Figure_6_figure_supplement_1.docx]

**Figure 6- figure supplement 1**

**A.**


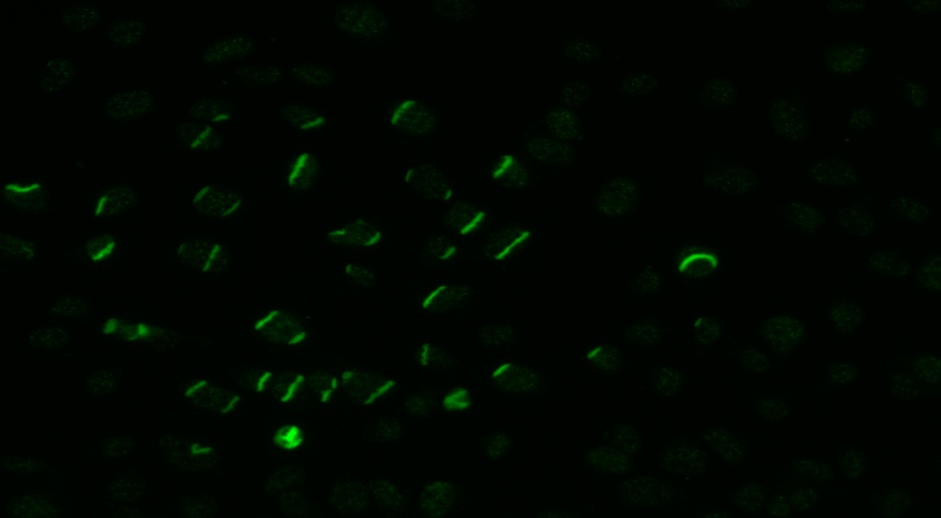

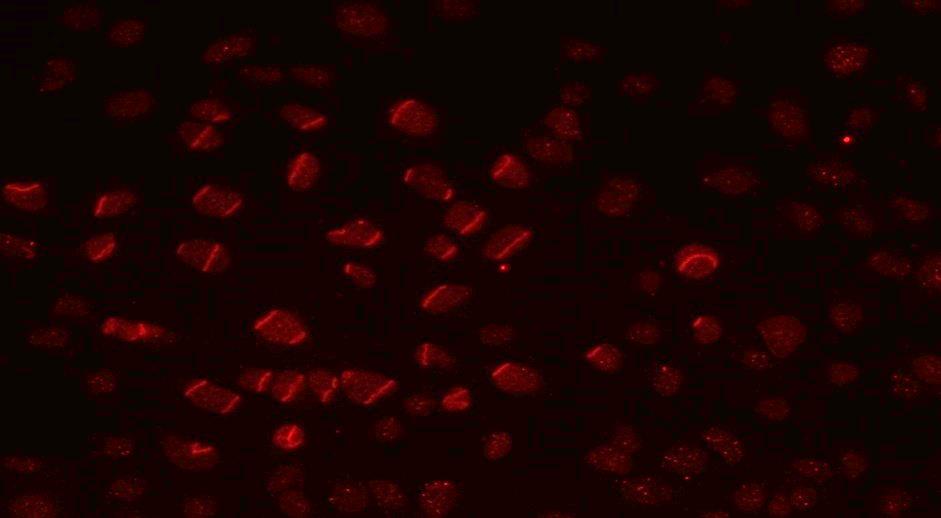

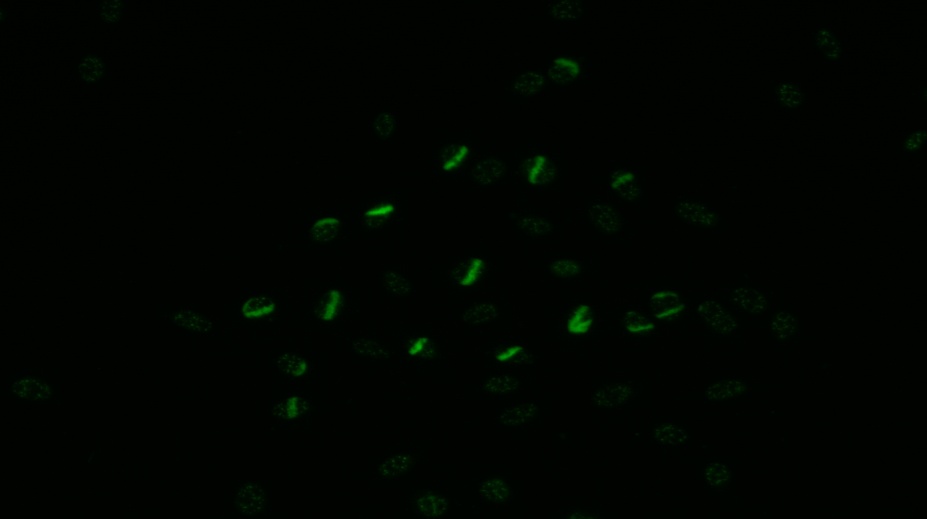

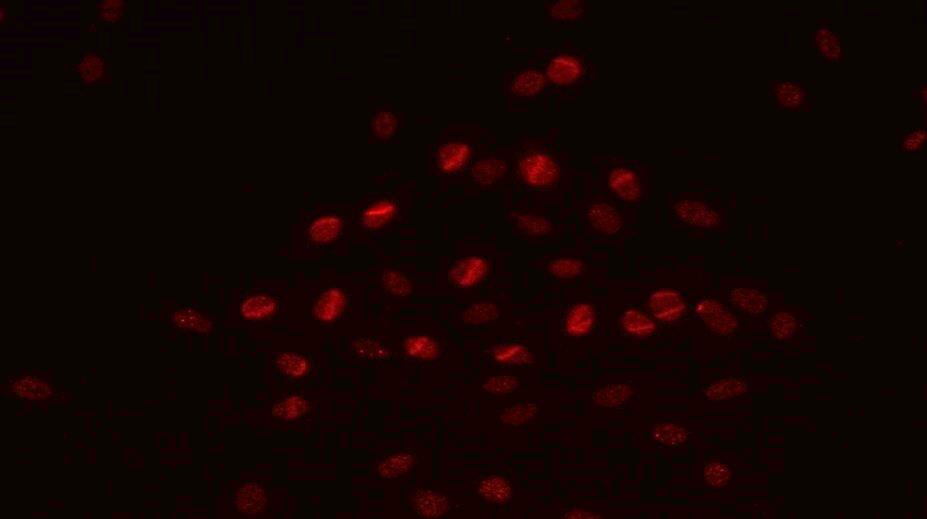

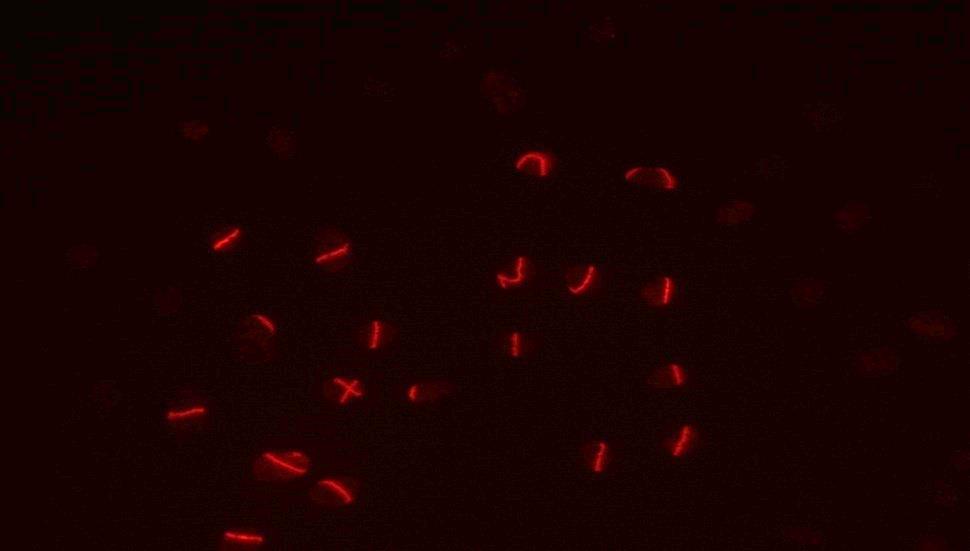

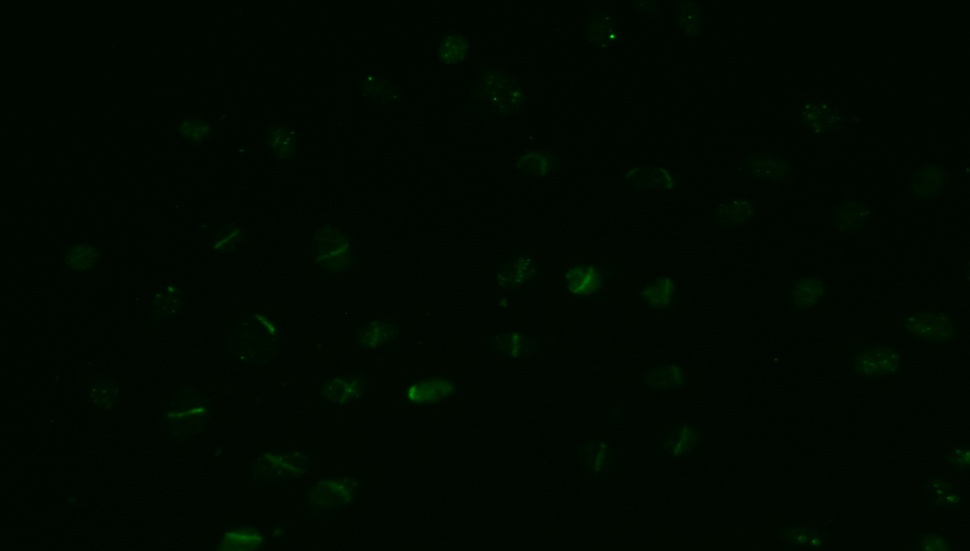

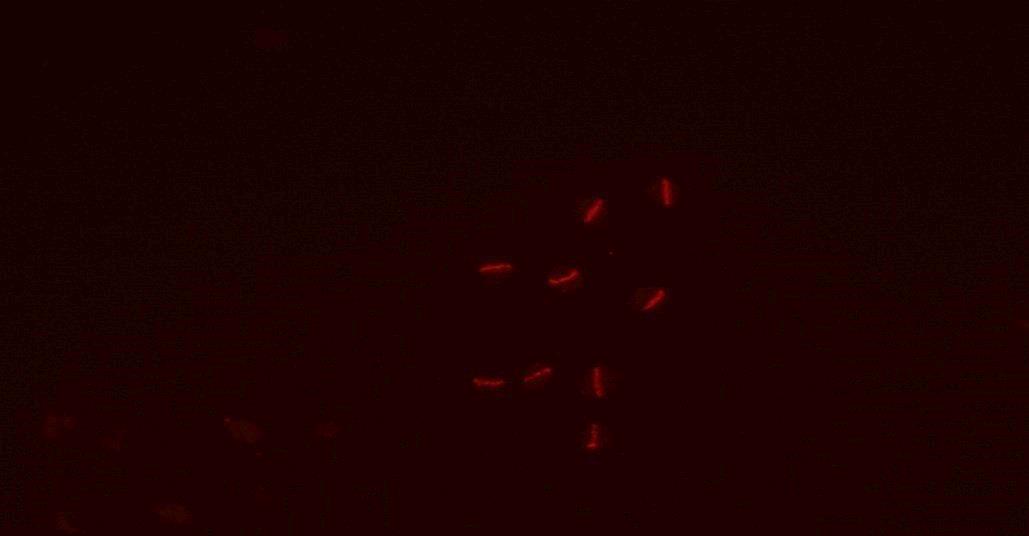

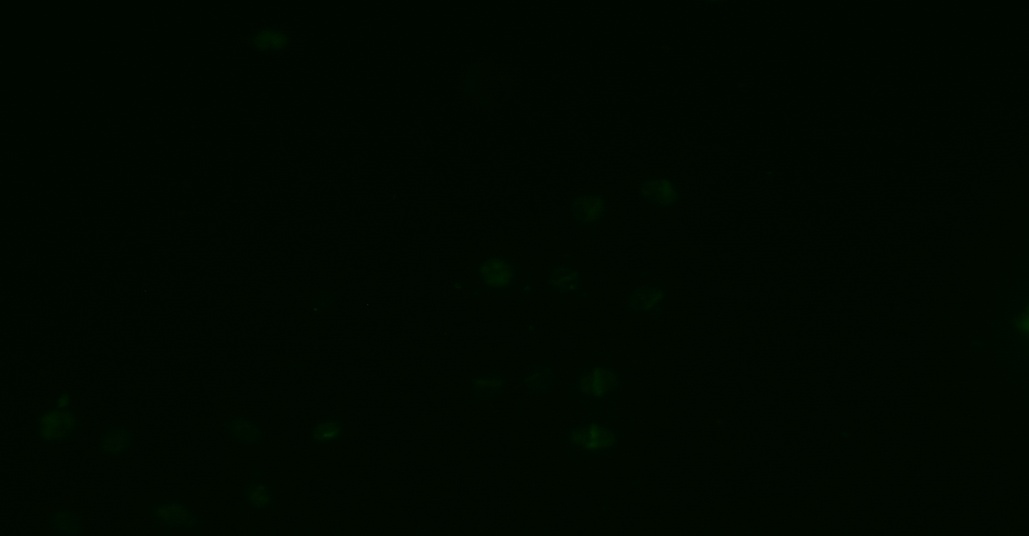

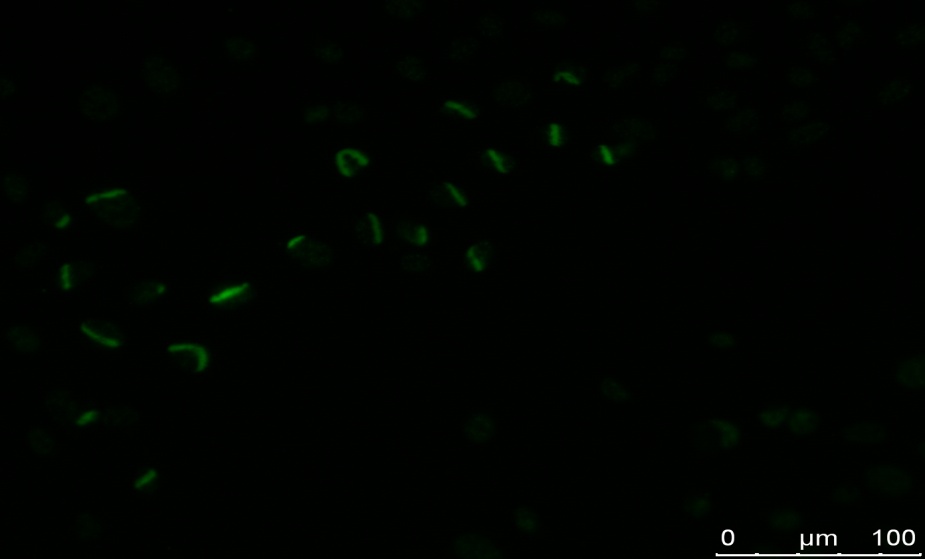

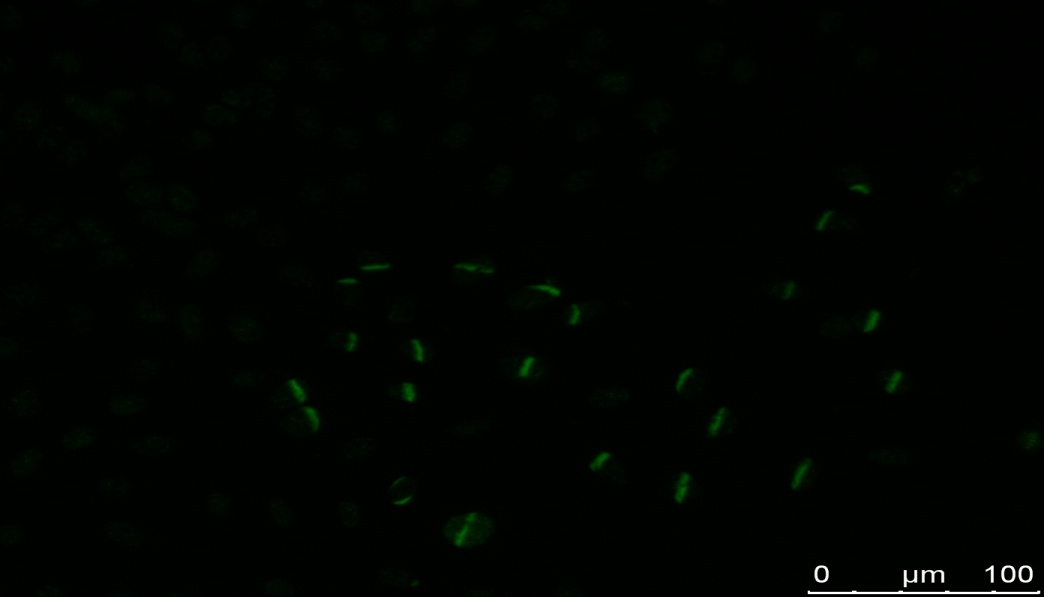

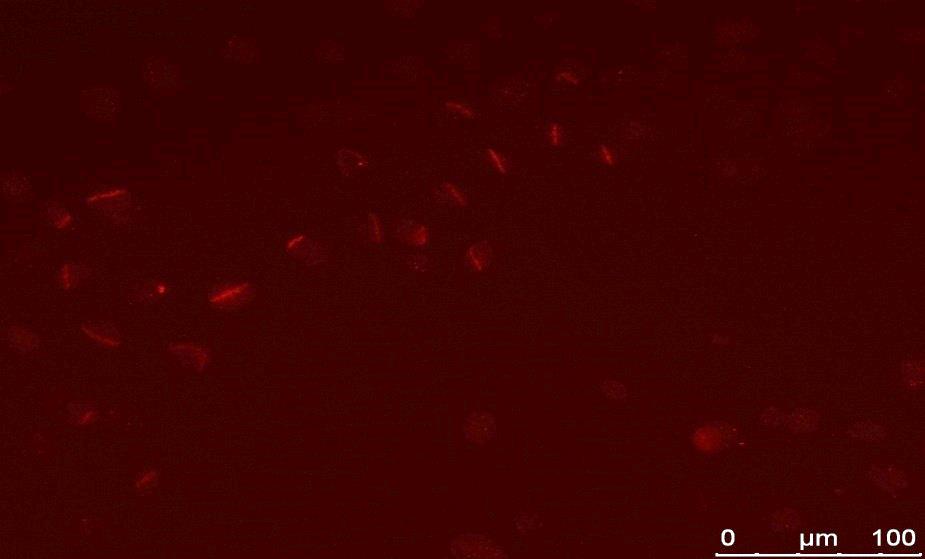

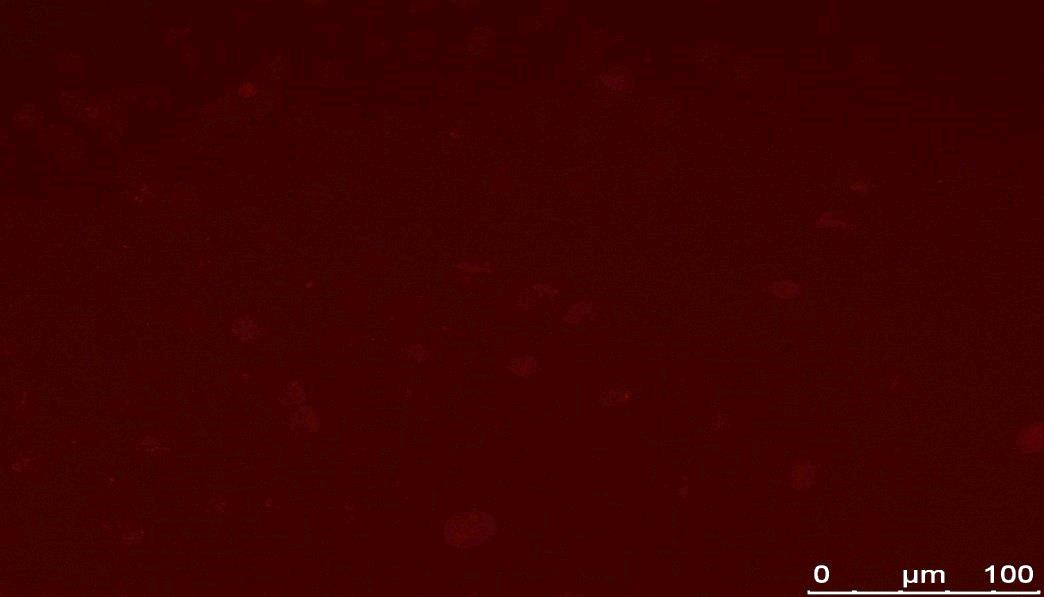


**shControl**

**shSIRT6**

**ɤH2AX**

**ɤH2AX**

**ɤH2AX**

**p-ATM**

**53BP1**

**BRCA1**

**Figure 6- figure supplement 1**

**(A)** Laser induced damaged followed by IF 30 min after damage. Recruitment of p-ATM, 53BP1 or BRCA1 in shCotrol or shSIRT6 U2OS.
