# Supplementary material for: SIRT6 is a DNA double-strand break sensor
Source: eLife journal article supplement (doi:10.7554/elife.51636), 2020-01-29
Supplement: supp [file elife_poa_e51636_Figure_6_figure_supplement_2.docx]

**Figure 6- figure supplement 2**

**A.**


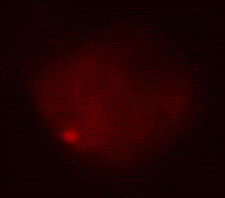

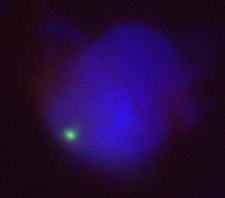

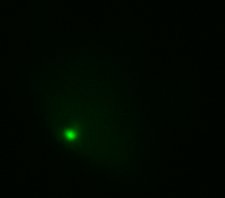

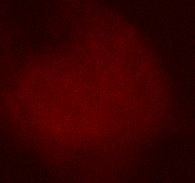

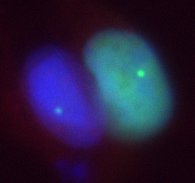

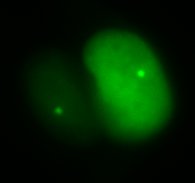


**SIR6-HY-LacR**

**BRCA1 ab**

**Merge + DAPI**

**GFP-LacR**

**BRCA1 ab**

**Merge + DAPI**


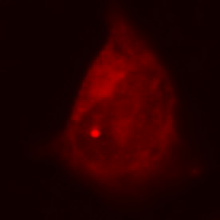

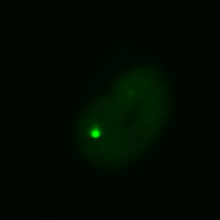

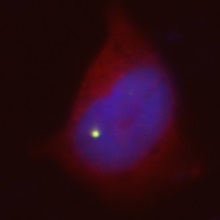


**SIRT-LacR**

**BRCA1 ab**

**Merge + DAPI**


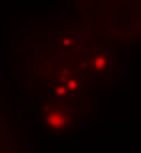

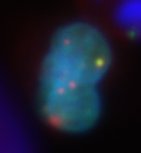

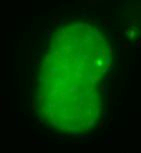

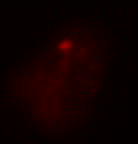

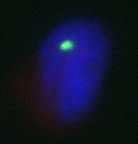

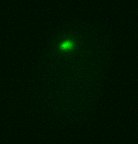

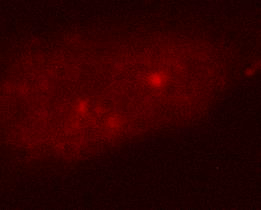

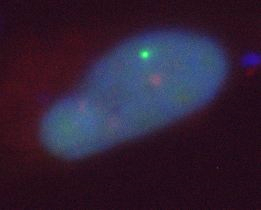

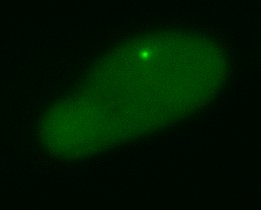


**53BP1 ab**

**Merge + DAPI**

**53BP1 ab**

**Merge + DAPI**

**53BP1 ab**

**Merge + DAPI**

**SIRT6-HY-LacR**

**GFP-LacR**

**SIRT6-LacR**

**B.**


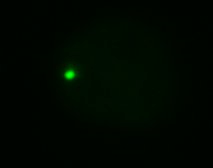

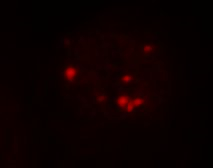

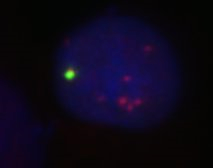

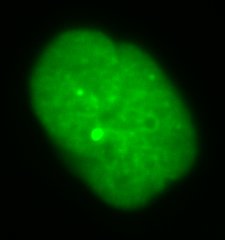

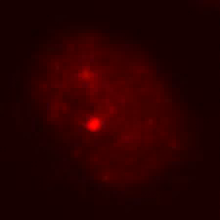

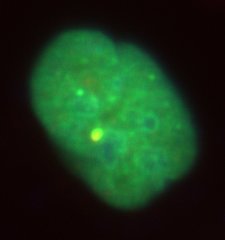


**SIRT6-LacR**

**53BP1 ab**

**Merge + DAPI**

**SIRT6-LacR**

**BRCA1 ab**

**Merge + DAPI**

**Endogenous Proteins**

**Transfected Proteins**


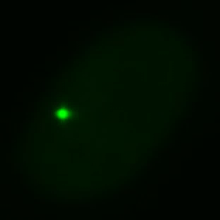

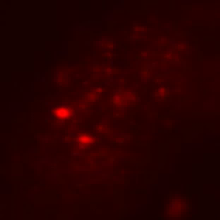

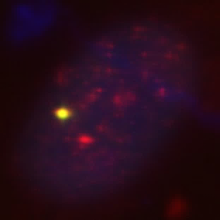


**SIRT6-LacR**

**BRCA1-Flag**

**Merge + DAPI**


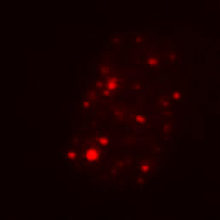

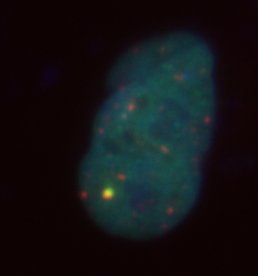

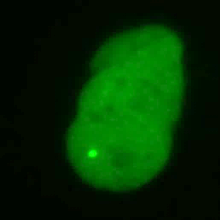


**53BP1-Flag**

**Merge + DAPI**

**SIRT6-LacR**

**C.**

**D.**

**Figure 6- figure supplement 2**

**(A-B)** Co-localization of 53BP1 and BRCA1 with SIRT6-LacR-GFP (53BP1: n=247, p<0.005; BRCA1: n=223, p<0.005) and HY-LacR-GFP (53BP1: n=113, p<0.005; BRCA1: n=122, p<0.005), compared with GFP-LacR (53BP1: n=130; BRCA1: n=157). Averages of 3-5 experiments +/- SEM. **(C-D)** Comparison of co-localization of endogenous 53BP1 (n=247) and BRCA1 (n=223) and transfected 53BP1-Flag (n=111) and BRCA1-Flag (n=146) with SIRT6-LacR-GFP, assessed by IF.
